# Supplementary material for: Lattice distortion and re-distortion affecting irradiation tolerance in high entropy alloys
Source: Royal Society of Chemistry journal article supplement (doi:10.1039/d3nr03465h), 2023-01-01
Supplement: d3nr03465h1.pdf [file d3nr03465h1.pdf]

Supplementary Information for  
**Lattice distortion and re-distortion affecting irradiation tolerance in high  
entropy alloys**

Peng-wei Wang<sup>1</sup>, Ming-fei Li<sup>1</sup>, Babafemi Malomo<sup>2</sup> and Liang Yang<sup>1, a)</sup>

<sup>1</sup>College of Materials Science and Technology, Nanjing University of Aeronautics  
and Astronautics, Nanjing 210016, P.R. China

<sup>2</sup>Department of Mechanical Engineering, Obafemi Awolowo University, Ile-Ife,  
Nigeria

a) Author to whom correspondence should be addressed: electronic mail:

[yangliang@nuaa.edu.cn](mailto:yangliang@nuaa.edu.cn)

Voronoi tessellation analysis is an effective 3-dimensional (3D) approach to building atomic clusters with one central atom that can be applied for extracting and indexing structural units in complex materials.<sup>1,2</sup> According to Voronoi original algorithm,<sup>3</sup> a convex Voronoi polyhedron (VP) can be built by connecting perpendicular bisectors between a central atom and all of its first-shell neighboring atoms, which may be indexed as  $\langle n_3, n_4, n_5, n_6 \dots \rangle$ , where  $n_i$  denotes the number of  $i$ -edged faces on surface of this polyhedron. Each VP should be embedded in a corresponding convex Voronoi cluster (VC), which is composed of a solute (center) atom and its neighboring solvent (shell) atoms (configurations of some VCs and corresponding VPs refer to Fig. 6 in Ref. [2] or Fig. 1 in Ref. [4]). Thus  $\sum n_i$  also represents the number of the shell atoms in eac VC, i.e., CN parameter around the central atom. Voronoi algorithm also requires that all VCs should be closed structural units, which could be formed by piling up a set of Delaunay tetrahedrons with the common vertex at an atom (the central atom of VC),<sup>5</sup> so that their surface should be composed only of triangle faces, i.e., they could be regarded as deltahedra.<sup>6</sup> Then take into account Euler's formula

$$V - E + F = 2, \quad (1)$$

where  $V$ ,  $E$  and  $F$  denote the numbers of vertexes (occupied by atoms), edges and faces of VCs, respectively.  $V$  (CN),  $F$  and  $E$  should satisfy the following equations:

$$3E = 2F = \sum i \times n_i$$

$$V = 0.5F + 2, \quad (2)$$

Evidently,  $\sum i \times n_i$  must be divisible by 6. According to the aforementioned method, various kinds of VCs could be extracted from structural models and correctly indexed.

### Supplementary References

- [1] J. L. Fenney, *Nature*, 1977, **266**, 309-314.
- [2] S. Y. Wang, M. J. Kramer, M. Xu, S. Wu, S. G. Hao, D. J. Sordelet, K. M. Ho and C. Z. Wang, *Phys. Rev. B*, 2009, **79**, 144205.
- [3]<http://www.ccl.net/cca/software/SOURCES/FORTRAN/allen-tildesley-book/f.35.shtml>
- [4] L. Yang and G. Q. Guo, *Chin. Phys. B*, 2010, **19**, 126101.
- [5] N. N. Medvedev, *J. Comput. Phys.*, 1986, **67**, 223-229.
- [6] H. W. Sheng, W. K. Luo, F. M. Alamgir, J. M. Bai and E. Ma, *Nature*, 2006, **439**, 419-425.
